# Internal Consistency, Test–Retest Reliability and Measurement Error of the Self-Report Version of the Social Skills Rating System in a Sample of Australian Adolescents

Sharmila Vaz<sup>1\*</sup>, Richard Parsons<sup>2</sup>, Anne Elizabeth Passmore<sup>2</sup>, Pantelis Andreou<sup>5</sup>, Torbjörn Falkmer<sup>2,3,4</sup>

**1** School of Occupational Therapy and Social Work, Centre for Research into Disability and Society, Curtin University, Perth, Western Australia, Australia, **2** School of Occupational Therapy and Social Work, Curtin Health Innovation Research Institute, Curtin University, Perth, Western Australia, Australia, **3** School of Occupational Therapy, La Trobe University, Melbourne, Vic. Australia, **4** Rehabilitation Medicine, Department of Medicine and Health Sciences (IMH), Faculty of Health Sciences, Linköping University & Pain and Rehabilitation Centre, UHL, County Council, Linköping, Sweden, **5** Department of Community Health and Epidemiology, Dalhousie University, Halifax, Nova Scotia, Canada

## Abstract

The social skills rating system (SSRS) is used to assess social skills and competence in children and adolescents. While its characteristics based on United States samples (US) are published, corresponding Australian figures are unavailable. Using a 4-week retest design, we examined the internal consistency, retest reliability and measurement error (ME) of the SSRS secondary student form (SSF) in a sample of Year 7 students ( $N = 187$ ), from five randomly selected public schools in Perth, western Australia. Internal consistency (IC) of the total scale and most subscale scores (except empathy) on the frequency rating scale was adequate to permit independent use. On the importance rating scale, most IC estimates for girls fell below the benchmark. Test–retest estimates of the total scale and subscales were insufficient to permit reliable use. ME of the total scale score (frequency rating) for boys was equivalent to the US estimate, while that for girls was lower than the US error. ME of the total scale score (importance rating) was larger than the error using the frequency rating scale. The study finding supports the idea of using multiple informants (e.g. teacher and parent reports), not just student as recommended in the manual. Future research needs to substantiate the clinical meaningfulness of the MEs calculated in this study by corroborating them against the respective Minimum Clinically Important Difference (MCID).

**Citation:** Vaz S, Parsons R, Passmore AE, Andreou P, Falkmer T (2013) Internal Consistency, Test–Retest Reliability and Measurement Error of the Self-Report Version of the Social Skills Rating System in a Sample of Australian Adolescents. PLoS ONE 8(9): e73924. doi:10.1371/journal.pone.0073924

**Editor:** Susanne Hempel, RAND Corporation, United States of America

**Received:** March 22, 2013; **Accepted:** July 24, 2013; **Published:** September 9, 2013

**Copyright:** © 2013 Vaz et al. This is an open-access article distributed under the terms of the Creative Commons Attribution License, which permits unrestricted use, distribution, and reproduction in any medium, provided the original author and source are credited.

**Funding:** This project was funded by the first author's Doctoral scholarship provided by the Centre for Research into Disability and Society and the School of Occupational Therapy and Social Work, Curtin University, Perth, Australia. The funders had no role in study design, data collection and analysis, decision to publish, or preparation of the manuscript.

**Competing interests:** The authors have declared that no competing interests exist.

\* E-mail: vazs2003@gmail.com

## Introduction

Social skills include socially acceptable learned behaviours that enable people to interact successfully with others and avoid undesirable responses [1]. These include sharing, initiating relationships, helping, giving compliments, self-control, understanding of others' feelings, and leadership in group situations [2,3]. The development of social skills is a fundamental task for all [4]. Competence in social skills is a general term of an evaluative nature, used to refer to the quality of an individual's social skill effectiveness or functionality in a given situation [2]. Social competence in children and adolescents serves as a mechanism for meaningful interactions with others, facilitates the formation of

friendships, and the engagement in a range of occupations required by life roles [5]. Positive associations exist between social competence, academic performance, and participation in everyday life activities [6–8]. Unfortunately, not all individuals acquire adequate competence in social skills.

Difficulties in achieving social competence can be due to social skill acquisition or performance deficits [9], and may impede the quality of an individual's social relationships and adjustment. For example, social competence deficits have been linked to social adjustment problems, such as peer rejection, loneliness, reduced school belongingness, and early withdrawal from school [10,11]. A variety of unfavourable outcomes beyond school, including psychopathology, excessive substance and alcohol use, chaotic lifestyle, limited

or absent postsecondary education, and reduced workplace participation have been documented among those with social competence deficits [12–15]. The far-reaching implications of poor social skill development on everyday activity participation underscore the need for practitioners to identify those at risk of disadvantageous outcomes from an early age [3]. Accordingly, reliable measures for assessing social skills and detecting social difficulties in children and adolescents are necessary.

Children's social behaviour has been found to vary across different settings [16]. Best practice recommends that children's social skills be assessed in the social environments in which the child functions, with assessment of child, other, and contextual variables as part of the assessment [17]. Routinely, practitioners use observation checklists, interviews, behaviour-rating scales, or socio-metric measures of social status among peers to assess social skills/competence in children and youth [14,18,19]. In order to minimize bias, information is collected across various settings (including home, school, recreational situations) by using a range of informants (including child, parent, teacher, peer, etc.) [14]. Behaviour rating scales have several advantages over other methods of assessment routinely used by health professionals to assess social skills [20]. Behaviour rating scales allow for easy, practical, and time-efficient assessment of a variety of traits and behaviors from multiple sources in multiple settings [19,21–23].

While behaviour rating scales capitalise on the informant's observations in the child's natural settings, informant (rater) bias (such as middle-class bias or depression) could confound the findings [24,25]. Empirical investigations support the contention that self-perception and cognitions are the most important predictors of behaviour [26]. An individual occupies a unique position to report on his/her behaviours across different situations, including home, classroom, playground, sports practice [27,28]. Various self-report measures have been successfully used over decades in both research and clinical settings to assess depression [29] and overall functioning [28] in children and youth.

Standardised behaviour rating scales form an important component in the evidence based assessment of social skills [30]. Standardised scales organise information in a systematic and quantifiable manner, and allow for empirical examination of their psychometric properties [31]. The Social Skills Rating System (SSRS) is one such standardised behaviour rating scale that allows for collection of social behaviours under a best-practice model of collecting information via multiple informants in multiple settings. Its multisource approach, intervention linkage, and overall strong evidence for reliability and validity cause it to be recognized as one of the most comprehensive and psychometrically robust of the available norm-referenced behaviour rating scales for use with children and youth both with and without disabilities or chronic illness [20,21,32,33].

Over the past decades, there has been exhaustive research on the teacher and parent versions of the SSRS [11,34–41]. The secondary level student self-report version of the SSRS (SSRS-SSF) has been used to test social competency development programs [42], analyse social support

development strategies and assess emotional behaviours and components [43,44]. In Australia, all versions of the SSRS are promoted by the Australian Council of Educational Research (ACER) and have been used by the Australian Institute of Family Studies (AIFS) in the Pathways from Infancy to Adolescence: Australian Temperament Project (ATP) [45]. To date, the psychometric rigor of the SSRS-SSF has not been tested in the Australian setting. Consequently, the present study was undertaken to evaluate the internal consistency, test retest reliability and ME of the SSRS-SSF in an Australian sample. The ME indices presented in this paper will enable clinicians outside the US to precisely determine whether a change in students' social skills after intervention represents a real behavioural change or not.

## Methodology

### Design and Procedure

A '4-week' test–retest design was used, with time as the only known source of variance [46]. Because of the diversity and number of items in the SSRS-SSF, time required to complete the measurement (25 minutes), and the interval between two administrations (4-weeks), it was assumed that participants would not remember their first responses and that no changes in behaviour would have occurred. A date and time that suited the school was arranged, and the SSRS-SSF was administered by the researcher at each school, using standard protocol [3]. Questionnaires were re-administered by the same researcher, using the same protocol, at the same setting and timing, after a 4-week interval.

### Ethical Clearance

Informed written consent was obtained from school principals, parents and students to participate in this study. In situations where the student declined to participate, even with parental consent, they were not included. Students were made aware that they were not obliged to participate in the study, and were free to withdraw from this study at any time without justification or prejudice.

At all stages, the study conformed to the National Health and Medical Research Council Ethics Guidelines [47]. Full ethics approval was obtained from Curtin University Health Research Ethics Committee (Reference number HR 194/2005).

### Participants

One hundred and eighty seven students agreed to participate in the study, and provided both baseline and 4-week follow-up data. The sample included 102 boys and 85 girls, and the average age of all participants was 12 years and 3 months ( $SD = 3.93$  months). These students were selected from five randomly selected public schools from two educational districts of metropolitan Perth, Western Australia. Inclusion was extended to all year 7 students who attended regular classes in these schools.

Sample size adequacy was determined by the guidelines set by Bland and Altman, where the standard error of the within-subject standard deviation ( $s_w$ ), is shown to depend on both

**Table 1.** Behaviours measured on each subscale of the SSRS-SSF and example of the rating scale used.

| Assertion subscale                      | Cooperation subscale                |
|-----------------------------------------|-------------------------------------|
| Get attention of opposite gender        | Finish classroom work               |
| Confident on dates                      | Do homework                         |
| Start conversation with opposite gender | Follow teacher's directions         |
| Ask for date                            | Ask before using things             |
| Compliment opposite gender              | Use nice voice                      |
| Make friends                            | Use free time                       |
| Start conversation with class members   | Listen to adults                    |
| Active in school activities             | Avoid trouble                       |
| Invite others to join activities        | Ask friends for favours             |
| Ask adults for help                     |                                     |
| Empathy subscale                        | Self-control subscale               |
| Understand how friends feel             | Accept punishment from adults       |
| Listen to friends' problems             | Avoid trouble                       |
| Say nice things to others               | Do nice things for parents          |
| Talk over classmates' problems          | Take criticism from parents         |
| Smile, wave, or nod                     | Control temper                      |
| Ask friends to help with problem        | Ignore classmates' clowning         |
| Feel sorry for others                   | Ignore classmates' teasing          |
| Tell others when they've done well      | End fights with parents             |
| Tell friends I like them                | Compromise with parents or teachers |
| Stand up for friends                    | Disagree without fighting           |

doi: 10.1371/journal.pone.0073924.t001

number of subjects ( $n$ ), and number of observations per subject ( $m$ ). The 95% confidence interval (CI) for  $s_w$  is determined to be  $sw \pm 1.96s_w/\sqrt{(2n(m-1))}$  [48]. With 2 repetitions ( $m = 2$ ), and requiring that the width of this interval is no more than  $\pm 0.1s_w$  (so that we are confident that we know  $s_w$  within 10%), the equation above can be solved for  $n$ . This minimum sample size is calculated to be  $n = 192$ . Our sample of 187 students is close to this figure, so that we can be confident that the estimate of  $s_w$  that we will obtain will be within 10% of its true (population) value.

### Instrument: The secondary level student self-report version of the SSRS (SSRS-SSF)

The SSRS-SSF assesses 39 social behaviours that parents, teachers or other members of the US community considered important, adaptive and functional to deem students in grades 7-12 socially competent [3]. The listed behaviours are categorised into four social skill domains: assertion; self-control; cooperation; and empathy (referred to as subscales) (Table 1) [3]. The SSRS-SSF assesses student's perspective of the frequency and importance (social validity) of social behaviour to their relationship with others, using a 3-point scale (Table 2).

Evidence from past research suggests that the total social skills scale version of the SSRS-SSF (frequency rating) has adequate internal consistency ( $\alpha = .83$ ) to permit its independent use in samples of multiracial US primary and secondary students with and without disabilities or chronic illnesses [3,49]. Subscale internal consistencies of the SSRS-

**Table 2.** Example of the rating scale used in the SSRS-SSF.

| Social skill                          | How often? |           |       | How important? |               |          |
|---------------------------------------|------------|-----------|-------|----------------|---------------|----------|
|                                       | Never      | Sometimes | Often | Very important | Not important | Critical |
| I start conversations with classmates | 0          | 1         | 2     | 0              | 1             | 2        |

doi: 10.1371/journal.pone.0073924.t002

SSF are insufficient to permit independent use for screening social behavioural difficulties (empathy,  $\alpha = 0.72-0.73$ ; cooperation,  $\alpha = 0.66-0.68$ ; self-control,  $\alpha = 0.68$ ; and assertion,  $\alpha = 0.67-0.69$ ). The 4-week test retest reliability of each subscale and total social skills scale in past investigations did not meet the benchmarked criteria for reliable use [50] (total social skills scale,  $r = 0.68$ ; empathy,  $r = 0.66$ ; cooperation,  $r = 0.54$ ; assertion,  $r = 0.52$ ; and self-control  $r = 0.52$ ) [3]. ME of the SSRS-SSF total social skills scale score (frequency rating) is reported as  $\pm 6$  units at 68, and  $\pm 12$  units at 95 percent CIs respectively. The ME of the importance rating scale has not been presented in the manual.

### Data analysis

Data analyses were undertaken using SPSS version 17 and SAS Version 9.2 software packages. Screening of the data, as recommended by Tabachnick and Fidell [51], was undertaken. Only 1.1% of data were missing at scale level. The estimation maximization (EM) algorithm and Little's chi-square statistic revealed that the data were missing completely at random (MCAR) [51,52]. Standard procedures for missing value replacement and scoring as recommended in the SSRS manual were implemented [3]. Given that the design of this study was to appraise the stability of both the frequency and importance rating scales, subscale and total scores for each rating scale were computed using the rules for the frequency scale. Analyses were performed with gender as a fixed factor, using the same strategy used with the standardisation sample [3]. The following indices were computed:

- 1 Cronbach's  $\alpha$ : To measure the internal consistency (homogeneity) of the SSRS, based on average inter-item correlations and the number of items.
- 2 Pearson's correlation coefficient ( $r$ ): To measure the strength of linear association, or the consistency of position between two sets of data [53].
- 3 Intraclass correlation coefficient (ICC): A two-way random effects absolute agreement model ( $ICC_{2,1}$ ) was computed [54].
- 4 The Bland and Altman 95% Limits of Agreement (LOA) and the Coefficient of Repeatability (CR) or the Smallest Real Difference (SRD): The Bland and Altman plot was examined visually to examine heteroscedasticity in the data [55]. The Coefficient of Repeatability (CR) also referred to as the Smallest Real Difference (SRD) was calculated by multiplying the Standard Error of Measurement (SEM) by 2.77 ( $\sqrt{2 \times 1.96}$ ) to indicate 95% confidence of a real difference between the

**Table 3.** Comparison of measures of reliability for social skills Frequency rating scale.

| Frequency Rating Scale |   | Time 1 |       | Time 2 |       | Relative and absolute reliability indices |       |                           |           |                                    |        |         |                 |                       |                           |                    |      |       |
|------------------------|---|--------|-------|--------|-------|-------------------------------------------|-------|---------------------------|-----------|------------------------------------|--------|---------|-----------------|-----------------------|---------------------------|--------------------|------|-------|
| GENDER                 | N | M      | SD    | M      | SD    | $\alpha$                                  | $r_a$ | ICC <sub>2,1</sub> (Bias) | Mean diff | SD <sub>diff</sub> between subject | t      | p-value | 95%LOA (95% CI) |                       | Within – subject Variance | SEM = $\sqrt{WSV}$ | CR   |       |
|                        |   |        |       |        |       |                                           |       |                           |           |                                    |        |         | LB              | UB                    |                           |                    |      |       |
| Assertion              | M | 84     | 13.24 | 3.11   | 13.90 | 3.10                                      | 0.89  | 0.78                      | 0.77      | 0.66                               | 17.20  | 2.90    | 0.005           | -3.4 (-4.1 to -2.6)   | 4.7 (3.9 to 5.5)          | 2.30               | 1.52 | 4.21  |
|                        | F | 74     | 12.86 | 3.07   | 13.27 | 3.07                                      | 0.84  | 0.72                      | 0.72      | 0.40                               | 16.22  | 1.52    | 0.13            | -4.1 (-5.0 to -3.2)   | 4.9 (4.0 to 5.8)          | 2.66               | 1.63 | 4.52  |
| Empathy                | M | 98     | 14.44 | 2.95   | 13.95 | 3.06                                      | 0.78  | 0.62                      | 0.62      | -0.49                              | 14.64  | -1.86   | 0.06            | -5.6 (-6.5 to -4.7)   | 4.6 (3.7 to 5.5)          | 3.49               | 1.87 | 5.18  |
|                        | F | 92     | 16.66 | 1.93   | 16.27 | 2.04                                      | 0.71  | 0.54                      | 0.53      | -0.38                              | 6.07   | -1.89   | 0.06            | -4.1 (-4.8 to -3.4)   | 3.4 (2.7 to 4.1)          | 1.89               | 1.37 | 3.81  |
| Cooperation            | M | 96     | 14.37 | 2.71   | 13.92 | 2.81                                      | 0.87  | 0.78                      | 0.77      | -0.45                              | 13.53  | -2.39   | 0.019           | -4.1 (-4.7 to -3.4)   | 3.2 (2.5 to 3.8)          | 1.78               | 1.34 | 3.70  |
|                        | F | 84     | 16.35 | 2.33   | 16.06 | 2.65                                      | 0.82  | 0.64                      | 0.63      | -0.28                              | 10.17  | -1.20   | 0.23            | -4.5 (-5.3 to -3.6)   | 3.9 (3.1 to 4.7)          | 2.28               | 1.51 | 4.18  |
| Self-control           | M | 92     | 11.51 | 2.97   | 11.84 | 2.97                                      | 0.86  | 0.67                      | 0.67      | 0.33                               | 14.75  | 1.31    | 0.19            | -4.4 (-5.3 to -3.5)   | 5.1 (4.2 to 5.9)          | 2.93               | 1.71 | 4.75  |
|                        | F | 86     | 13.65 | 3.44   | 13.60 | 2.97                                      | 0.84  | 0.71                      | 0.70      | -0.05                              | 17.60  | -0.22   | 0.82            | -4.9 (-5.9 to -4.0)   | 4.8 (3.9 to 5.7)          | 3.05               | 1.75 | 4.84  |
| Total Social skills    | M | 102    | 53.53 | 8.55   | 53.64 | 8.72                                      | 0.87  | 0.75                      | 0.76      | 0.11                               | 130.86 | 0.18    | 0.85            | -11.8 (-13.8 to -9.7) | 12 (9.9 to 14.1)          | 18.24              | 4.27 | 11.84 |
|                        | F | 85     | 58.33 | 7.64   | 58.16 | 8.08                                      | 0.87  | 0.75                      | 0.75      | -0.16                              | 108.30 | -0.28   | 0.78            | -11.0 (13.1 to -9.0)  | 10.7 (8.6 to 12.8)        | 15.18              | 3.90 | 10.80 |

ICC<sub>2,1</sub> Intraclass correlation coefficient: two-way random effect model (absolute agreement definition)

95% LOA LB (95% CI of the LOA) = Bland and Altman 95% Limits of agreement Lower Boundary (95% Confidence intervals of the limits of agreement)

95% LOA UB (95% CI of the LOA) = Bland and Altman 95% Limits of agreement Upper Boundary (95% Confidence intervals of the limits of agreement)

CR = 2.77 × SEM

doi: 10.1371/journal.pone.0073924.t003

true scores (the  $\sqrt{2}$  term appears as a result of the difference of the two variances) [55–57]. The SEM is the square-root of the within-subject variance (WSV) [i.e.,  $SEM = \sqrt{WSV} = \sqrt{(total\ variance) (1 - ICC)}$ ].

## Results

### Internal consistency

An internal consistency analysis was performed calculating Cronbach's  $\alpha$  for each of the four subscales (assertion, cooperation, empathy, and self-control), as well as for the total social skills scale score on the frequency and importance rating scale. Salvia and Ysseldyke's [58] criteria for 'acceptable internal consistency for screening purposes' were used to benchmark estimates as recommended by the SSRS developers [3]. As shown in Tables 3 and 4, the internal consistency of the total social skills scale score ( $\alpha = 0.87$ ) met the benchmark level. With the exception of the empathy subscale (girls = 0.71, and boys = 0.78), all other subscales had acceptable  $\alpha$ -values. On the importance rating form, variability in internal consistency due to gender was noted. The  $\alpha$ -value of the total social skills scale score for girls fell below the benchmark ( $\alpha = 0.78$ ) while that for boys exceeded the

benchmark level ( $\alpha = 0.88$ ). Similarly, lower  $\alpha$ -values were identified on the empathy, cooperation, and self-control subscales for girls, all of which were in the moderate category [59]. In the case of boys, the internal consistency estimates (for each subscale and total scale score) met minimal criteria of acceptable value for screening purposes.

### Indices of relative reliability

Correlations between the test and retest scores on each subscale and total social skills scale score were estimated using Pearson's  $r$  and the ICC (<sub>2,1</sub>) statistics. Vincent's benchmarks were used as the benchmark to interpret Pearson's  $r$  and ICC, wherein a value of over 0.90 was considered high, between 0.80 and 0.90 labelled moderate, 0.80 and below insufficient [50]. The 4-week stability correlation for the total social skills scales and subscales (both frequency and importance) did not meet the recommended benchmarks for reliable use.

### ME: Indexed by the Coefficient of Repeatability (CR) or the Smallest Real Difference (SRD)

The Bland and Altman plot was used to show the 95% upper and lower Limits of Agreement (LOA) which represent the

**Table 4.** Comparison of measures of reliability for social skills Importance rating scale.

| Importance Rating Scale |   | Time 1 |       | Time 2 |       | Relative and absolute reliability indices |       |                           |           |                                    |        |                 |        |                          |                           |                      |      |       |
|-------------------------|---|--------|-------|--------|-------|-------------------------------------------|-------|---------------------------|-----------|------------------------------------|--------|-----------------|--------|--------------------------|---------------------------|----------------------|------|-------|
| GENDER                  | N | M      | SD    | M      | SD    | $\alpha$                                  | $r_a$ | ICC <sub>2,1</sub> (Bias) | Mean diff | SD <sub>diff</sub> between subject | t      | p-value(95% CI) | 95%LOA |                          | Within – subject Variance | SEM= $\sqrt{}$ (WSV) | CR   |       |
|                         |   |        |       |        |       |                                           |       |                           |           |                                    |        |                 | LB     | UB                       |                           |                      |      |       |
| Assertion               | M | 69     | 11.46 | 4.14   | 11.44 | 4.18                                      | 0.80  | 0.67                      | 0.67      | -0.03                              | 28.96  | -0.07           | 0.95   | -6.64 (-7.9 to -5.3)     | 6.58 (5.3 to 7.9)         | 5.60                 | 2.37 | 6.56  |
|                         | F | 69     | 11.22 | 3.41   | 11.04 | 3.74                                      | 0.81  | 0.69                      | 0.69      | -0.17                              | 16.76  | -0.51           | 0.61   | -5.76 (-6.9 to -4.6)     | 5.42 (4.2 to 6.6)         | 3.24                 | 1.80 | 4.99  |
| Empathy                 | M | 97     | 12.84 | 3.58   | 11.60 | 4.02                                      | 0.79  | 0.66                      | 0.62      | -1.23                              | 21.73  | -3.83           | 0.000  | -7.40 (-5.8 to -6.3)     | 4.94 (3.9 to 6.0)         | 5.64                 | 2.37 | 6.58  |
|                         | F | 86     | 14.45 | 3.12   | 13.40 | 3.87                                      | 0.68  | 0.52                      | 0.48      | -1.04                              | 14.29  | -2.79           | 0.006  | -7.9 (-9.1 to -6.6)      | 5.8 (4.5 to 7.0)          | 5.94                 | 2.44 | 6.76  |
| Cooperation             | M | 93     | 13.65 | 3.83   | 12.19 | 4.27                                      | 0.82  | 0.70                      | 0.65      | -1.45                              | 22.43  | -4.44           | 0.000  | -7.64 (-8.8 to -6.5)     | 4.74 (3.6 to 5.9)         | 6.13                 | 2.48 | 6.87  |
|                         | F | 73     | 15.10 | 3.23   | 13.93 | 3.90                                      | 0.67  | 0.51                      | 0.47      | -1.16                              | 16.98  | -2.78           | 0.007  | -8.16 (-9.6 to -6.7)     | 5.84 (4.4 to 7.3)         | 6.97                 | 2.64 | 7.32  |
| Self-control            | M | 83     | 12.54 | 3.83   | 11.94 | 4.17                                      | 0.87  | 0.77                      | 0.76      | -0.67                              | 26.99  | -2.25           | 0.027  | -6.04 (-7.1 to -5.0)     | 4.70 (3.7 to 5.7)         | 3.82                 | 1.95 | 5.42  |
|                         | F | 76     | 14.25 | 3.53   | 13.21 | 4.15                                      | 0.77  | 0.63                      | 0.59      | -1.03                              | 19.22  | -2.70           | 0.009  | -7.62 (-8.9 to -6.3)     | 5.56 (4.2 to 6.9)         | 5.57                 | 2.36 | 6.54  |
| Total Social skills     | M | 101    | 50.55 | 13.51  | 47.91 | 14.35                                     | 0.88  | 0.79                      | 0.78      | -2.64                              | 288.15 | -2.94           | 0.004  | -20.38 (-23.4 to -17.3)  | 15.1 (12.0 to 18.2)       | 43.51                | 6.60 | 18.28 |
|                         | F | 82     | 53.45 | 10.85  | 51.49 | 13.96                                     | 0.78  | 0.66                      | 0.63      | -1.96                              | 212.66 | -1.67           | 0.10   | -22.89 (-26.9 to -18.90) | 18.97 (14.9 to 23.0)      | 50.14                | 7.08 | 19.63 |

ICC<sub>2,1</sub> Intraclass correlation coefficient: two-way random effect model (absolute agreement definition)

95% LOA LB (95% CI of the LOA) = Bland and Altman 95% Limits of agreement Lower Boundary (95% Confidence intervals of the limits of agreement)

95% LOA UB (95% CI of the LOA) = Bland and Altman 95% Limits of agreement Upper Boundary (95% Confidence intervals of the limits of agreement)

CR = 2.77 × SEM

doi: 10.1371/journal.pone.0073924.t004

boundaries of ME [55,60]. Following this method, the direction and magnitude of the scatter of difference scores around the zero line were explored by plotting the difference in values against respective mean scores (Figures 1 and 2). The plot of difference against mean scores also allowed investigation of any possible relationship (correlation) between ME and the assumed true value (i.e., the mean value of two methods). To test for heteroscedasticity, the correlation between the differences and the mean of the observations was calculated and tested against the null hypothesis of  $r = 0$ . Heteroscedasticity was found not to be present on all subscale and total scale scores. In each exploration, the Upper and Lower Limits of Agreement (LOA) bounds and their 95% CIs were spread on either side of zero and met the Bland and Altman criteria to classify the the difference between the two measurements to be due to ME alone [55,61,62]. The repeatability coefficient (CR) also referred to as the Smallest Real Difference (SRD) was computed to assess the ME for each subscale and scale, on the frequency and importance rating systems [56,61,63]. The CR gives the value below which the absolute differences between two repeated social skills

scale/subscale scores, in another year 7 Australian student, would lie with 0.95 probability [64].

Figure 1.

**Bland and Altman difference plot using boys' assertion frequency scores as an example.**

Tables 3 and 4 present the boundaries of true change in social skills on each subscale using frequency and importance ratings. The ME of the total social skills frequency scale for boys (CR = 11.84) was similar to the published figures from the US sample equivalent, while that for girls (CR = 10.80) was less than the corresponding US estimate of 12 units [3]. Although the ME of the importance rating scale was not presented in the manual, for the current sample of year 7 Australian students, the CR on the importance subscale was wider than that on the frequency subscale.

## Discussion

Standardised tools are increasingly being recognised as an essential component of evidence-based practice. Reliance on these tools places demands on clinicians to understand their properties, strengths and weaknesses, in order to interpret

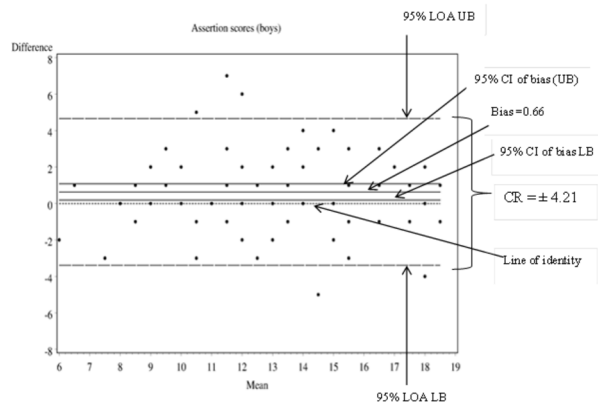

**Figure 1. Bland and Altman difference plot using boys' assertion frequency scores as an example.**

doi: 10.1371/journal.pone.0073924.g001

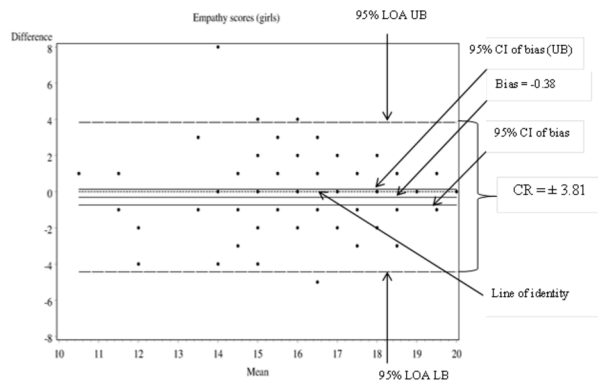

**Figure 2. Bland and Altman difference plot using girls' empathy frequency scores as an example.**

doi: 10.1371/journal.pone.0073924.g002

results that influence clinical decisions. This study presents evidence on the internal consistency, test-retest reliability and ME of the secondary level student self-report version of the SSRS (SSRS-SSF), using a sample of grade 7 students from Australia. The self-report version was selected based on the evidence that an adolescent's perceptions of behaviours is the most reliable marker of psychosocial outcomes [16,27].

The present study found acceptable levels of internal consistency for the total social skills scale score, for both genders (frequency scale). On the importance rating scale, student gender appeared to moderate the internal consistency estimate, with the total scale score for girls falling just short of the benchmarked threshold. Internal consistency estimates of subscales (frequency) suggested better homogeneity in the current sample than that reported in the manual [3]. In the case of the US standardisation sample, none of the subscales (frequency) had homogeneity coefficients above the standard for acceptable use for screening purposes [3,59]. In the case of our Australian sample, all subscales on the frequency form apart from the empathy frequency subscale (across gender)

were sufficiently homogenous to permit reliable independent use. On the importance rating scale, however, the empathy, cooperation, and self-control subscales for girls were not found to be homogeneous enough for independent use. Clinically, these findings highlight the need for practitioners in US and Australia to exercise caution while using the less homogenous subscales as independent screeners of the social skills constructs they have been designed to measure.

Pearson's correlation and the random effects ICC<sup>(2-1)</sup> were used to assess the 4-week test-retest stability of each subscale and total scale score, on both the frequency and importance rating systems [53]. For the current sample, the Pearson's *r* and ICC estimates were similar in value, for each subscale and scale score, on both the frequency and importance rating scales. Estimates of all subscale and scale scores (on the frequency and importance rating forms) did not meet the benchmarked criteria for reliable use [50]. The insufficient reliability estimates reported in these studies as well as the SSRS manual suggest that clinicians should avoid using the SSRS-SSF as a sole measure of year 7 students' social skills.

The CR were computed to assess the ME of the SSRS-SSF subscales and total scales, on the frequency and important rating forms [55,56,63]. The CR includes both systematic and random error in its value and gives the value below which the absolute differences between two repeated social skills scores would lie with 0.95 probability [61,64]. As an example, based on the current study's findings, clinicians using the SSRS-SSF total social skills scale score (frequency form) with a year 7 Australian youth would need to see a change of at least,  $\pm 11.80$  at re-assessment, to be 95% confident that the boy had, in fact, benefited from the intervention. The ME of the total social skills frequency scale was comparable to US norms reported in the manual during scale standardisation [3]. The ME of the total social skills scale score for the current sample (boys =  $\pm 18.28$  and girls =  $\pm 19.63$ ) were wider than the equivalent errors on the frequency scale; despite using the same method to compute the scores [3]. Based on the ME indices presented in this study, one could conclude that relative to the frequency rating scale, the importance rating scale of the SSRS-SSF has wider ME.

It is important to recognise that ME estimates of the SSRS-SSF presented in this paper hold limited clinical importance beyond setting the boundaries of the minimal detectable true change [56]. ME does not provide an understanding into whether the change in score is of clinical importance. The latter is determined by the Minimum Clinically Important Difference (MCID) [65], which is decided on clinical grounds (and not based on statistical analysis). The clinical suitability of ME of the SSRS-SSF presented in this study needs to be corroborated against its MCID score to substantiate its clinical relevance. Given past use of the SSRS as a screener of behaviour problems and in treatment effectiveness intervention studies, the research is desirable as clinically meaningful change could be masked if the ME (i.e., the CR in this context) of each subscale and total scale score is wider than the respective MCIDs [57].

The focus of this study was on the reliability of the secondary self-report student version of the SSRS. We recognize that the version of the SSRS used in this study is appropriate for use with children in Grades 7-12. Our explicit focus on Grade 7 children limits the ability to generalize the findings of this study to other grade levels for which this instrument may be used. The overall generalizability of the study's findings is limited due to the small sample size of the study ( $N = 187$ ) [48]. It is important to note that Pearson's ( $r$ ) does not measure agreement, but instead is a measure of how well the data fit a straight line. Despite its limitation, the ICC can be applied to more than two retest administrations. We acknowledge that the Bland and Altman method cannot be directly applied beyond paired data.

A newer version of the SSRS-SSF called the Social Skills Improvement System-Rating System (SSIS-RS) is in circulation

## References

- Gresham FM (1986) Conceptual and definitional issues in the assessment of children's social skills: Implications for classification and training. *J Clin Child Psychol* 15: 3-15. doi:10.1207/s15374424jccp1501\_1.
- McFall RM (1982) A review and reformulation of the concept of social skills. *Behav Assess* 4: 1-33. doi:10.1007/BF01321377.
- Gresham FM, Elliott SN (1990) Social skills rating system: Manual. Circle Pines, MN, American Guidance Service.
- Cronin A (1996) Psychosocial and emotional domains of behavior. In: J Case-SmithA AllenP Pratt. *Occupational therapy for children*. third ed. St. Louis: Mosby.
- Rodger S, Ziviani J (2006) Occupational therapy with children: Understanding children's occupations and enabling participation. Oxford: Blackwell.
- Marsh HW (1992) Extracurricular activities: Beneficial extension of the traditional curriculum or subversion of academic goals? *J Educ Psychol* 84: 553-562. doi:10.1037/0022-0663.84.4.553.
- Marsh HW, Kleitman S (2002) Extracurricular school activities: The good, the bad, and the non-linear. *Harv Educ Rev* 72: 464-514.
- Donaldson SJ, Ronan KR (2006) The effects of sports participation on young adolescents' emotional well-being. *Adolescence* 41: 369-389. PubMed: 16981623.
- Gresham FM (1997) Social competence and students with behavior disorders: Where we've been, where we are, and where we should go. *Educ Treat Child* 20: 233-249.
- Cowen EL, Pederson A, Babigian H, Izzo LD, Trost MA (1973) Long-term follow-up of early detected vulnerable children. *J Consult Clin Psychol* 41: 438-446. doi:10.1037/h0035373. PubMed: 4803276.
- Jurado M, Cumba-Aviles E, Collazo LC, Matos M (2006) Reliability and validity of a Spanish version of the social skills rating system-teacher form. *J Psychoeduc Assess* 24: 195-209. doi: 10.1177/0734282906288961.
- Wagner M, D'Amico R, Marder C, Newman L, Blackorby J (1992) What happens next? Trends in post school outcomes of youth with disabilities. Menlo Park, CA: SRI International.
- Segrin C (2000) Social skills deficits associated with depression. *Clin Psychol Rev* 20: 379-403. doi:10.1016/S0272-7358(98)00104-4. PubMed: 10779900.
- Spence SH (2003) Social Skills Training with Children and Young People: Theory, Evidence and Practice. *Child Adolesc Ment Health* 8: 84-96. doi:10.1111/1475-3588.00051.
- Schulz SC, Koller MM (1989) Schizophrenia and schizophreniform disorder. In: Hsu LK, George, Hersen M, editors. *Recent developments in adolescent psychiatry*Wiley series in child and adolescent mental health. New York: John Wiley & Sons. pp. 289-308
- Achenbach TM, McConaughy SH, Howell CT (1987) Child/adolescent behavioral and emotional problems: Implications of cross-informant correlations for situational specificity. *Psychol Bull* 101: 213-232. doi: 10.1037/0033-2909.101.2.213. PubMed: 3562706.
- Sheridan SM, Hungelmann A, Maughan DP (1999) A contextualized framework for social skills assessment, intervention, and generalization. *Sch Psychol Rev* 28: 84-103.
- Merrell KW, Streeter AL, Boelter EW, Caldarella P, Gentry A (2001) Validity of the home and community social behavior scales: Comparisons with five behaviour-rating scales. *Psychol Sch*: 313-325.
- Merrell KW (2011) Assessment of children's social skills: recent developments, best practices, and new directions. *Exceptionality* 9: 3-18.
- Lim SM, Rodger S (2008) An Occupational Perspective on the Assessment of Social Competence in Children. *Br J Occup Ther* 71: 469-481.
- Demaray MK, Ruffalo SL (1995) Social skills assessment. A comparative evaluation of six published rating scales. *Sch Psychol Rev* 24: 648-672.
- Luiselli JK, McCarty JC, Coniglio J, Zorilla-Ramirez C, Putnam RF et al. (2005) Social skills assessment and intervention: review and recommendations for school practitioners. *J Appl Sch Psychol* 21: 21-38. doi:10.1300/J370v21n01\_02.
- Elliott SN, Busse RT, Gresham FM (1993) Behavior rating scales: Issues of use and development. *Sch Psychol Rev* 22: 313-321.
- Youngstrom E, Izard C, Ackerman B (1999) Dysphoria-related bias in maternal ratings of children. *J Consult Clin Psychol* 67: 905-916. doi: 10.1037/0022-006X.67.6.905. PubMed: 10596512.
- Youngstrom E, Loeber R, Stouthamer-Loeber M (2000) Patterns and correlates of agreement between parent, teacher, and male adolescent ratings of externalizing and internalizing problems. *J Consult Clin Psychol* 68: 1038-1050. doi:10.1037/0022-006X.68.6.1038. PubMed: 11142538.
- Beitchman JH, Corradini A (1988) Self-report measures for use with children: a review and comment. *J Clin Psychol* 44: 477-490. doi: 10.1002/1097-4679(198807)44:4. PubMed: 3049679.
- Loeber R, Green SM, Lahey BB (1990) Mental health professionals' perception of the utility of children, mothers, and teachers as informants on childhood psychopathology. *J Clin Child Psychol* 19: 136-143. doi: 10.1207/s15374424jccp1902\_5.
- Achenbach TM (1991) Manual for the youth self-report and 1991 profile. Burlington, VT: University of Vermont. Department of Psychiatry.
- Kovacs M (1997) Depressive disorders in childhood: An impressionistic landscape. *J Child Psychol Psychiatry* 38: 287-298. doi:10.1111/j.1469-7610.1997.tb01513.x. PubMed: 9232475.
- Elliott SN, Malecki CK, Demaray MK (2001) New Directions in Social Skills Assessment and Intervention for Elementary and Middle School Students. *Exceptionality* 9: 19-32. doi: 10.1080/09362835.2001.9666989.
- McConaughy SH, Ritter DR (1995) Best practices in multidimensional assessment of emotional or behavioral disorders. In: A Thomas:J Grimes. *Best practices in school psychology- III*. Washington, D.C.: National Association of School Psychologists. pp. 865-8877.
- Bracken BA, Keith LK, Walker KC (1994) Assessment of preschool behavior and social-emotional functioning: A review of thirteen third-party instruments. *Assess Rehabil Exceptionality* 1: 331-346.
- Merrell KW, Gimpel GA (1998) Social skills of children and adolescents: Conceptualization, assessment, treatment. Mahwah, NJ: Lawrence Erlbaum.

34. Bramlett R, Smith B, Edmonds J (1994) A comparison of non-referred learning disabled and mildly mentally retarded students utilizing the Social Skills Rating System. *Psychol Sch* 31: 13-19. doi: 10.1002/1520-6807(199401)31:1.
35. Fagan J, Fantuzzo JW (1999) Multirater congruence on the social skills rating system: Mother, father, and teacher assessments of urban head start children's social competencies. *Early Child Res Q* 14: 229-242. doi:10.1016/S0885-2006(99)00010-1.
36. Fantuzzo JW, Manz PH, McDermott P (1998) Preschool version of the social skills rating system: An empirical analysis of its use with low-income children. *J Sch Psychol* 36: 199-214. doi:10.1016/S0022-4405(98)00005-3.
37. Flanagan DP, Alfonso VC, Primavera LH, Povall L, Higgins D (1996) Convergent validity of the BASC and SSRS: Implications for social skills assessment. *Psychol Sch* 33: 13-23. doi:10.1002/(SICI)1520-6807(199601)33:1.
38. Malecki CK, Elliot SN (2002) Children's social behaviours as predictors of academic achievement: A longitudinal analysis. *Sch Psychol Q* 17: 1-23. doi:10.1521/scpq.17.1.1.19902.
39. Manz PH, Fantuzzo J, McDermott P (1999) The parent version of the preschool social skills rating scale: An analysis of its use with low-income, ethnic minority children. *Sch Psychol Rev* 28: 493-504.
40. Van der Oord S, Van der Meulen EM, Prins PJM, Oosterlaan J, Buitelaar JK et al. (2005) A psychometric evaluation of the social skills rating system in children with attention deficit hyperactivity disorder. *Behav Res Ther* 43: 733-746. doi:10.1016/j.brat.2004.06.004. PubMed: 15890166.
41. Walthall JC, Konold TR, Pianta RC (2005) Factor structure of the social skills rating system across child gender and ethnicity. *J Psychoeduc Assess* 23: 201-215. doi:10.1177/073428290502300301.
42. Tynes-Jones JM (2007) A social skills program in third-grade classrooms. *Dissert Abstr Int B Sci Eng* 67: 5387.
43. Lang SC (2005) Social support: An examination of adolescents' use of strategies for obtaining support. *Dissert Abstr Int A Humanit Soc Sci* 66: 1639.
44. Epstein MH, Mooney P, Ryser G (2004) Validity and reliability of the behavioral and emotional rating scale (2nd Ed.): Youth rating scale. *Research on Social Work Practice* 14: 358-367.
45. Prior M, Sanson A, Smart D, Oberklaid F (2000) Infancy to adolescence: Australian temperament project 1983-2000. Melbourne: Australian Institute of Family Studies.
46. Hopkins WG (2000) Measures of reliability in sports medicine and science. *Sports Med* 30: 1-15. doi: 10.2165/00007256-200030010-00001. PubMed: 10907753.
47. National Health and Medical Research Centre. NHMRC] (2005) Human research ethics Handbook: A research law collection
48. Bland JM, Altman DG (1996) Statistics Notes: Measurement error. *BMJ* 313: 744. doi:10.1136/bmj.313.7059.744a. PubMed: 8819450.
49. Diperna JC, Volpe RJ (2005) Self-report on the social skills rating system: Analysis of reliability and validity for an elementary sample. *Psychol Sch* 42: 345-354. doi:10.1002/pits.20095.
50. Vincent WJ (1999) *Statistics in Kinesiology* Champaign, IL: Human Kinetic.
51. Tabachnick B, Fidell L (2007) *Using multivariate statistics*. Boston, MA: Pearson Education Inc. and Allyn & Bacon.
52. Meyers LS, Gamst G, Guarino AJ (2006) *Applied multivariate research: Design and implication*. CA: Sage Publications, Inc.
53. Portney LG, Watkins MP (2000) *Foundations of clinical research: Applications to practice*. Upper Saddle River, NJ: Prentice Hall.
54. Field A (2005) *Discovering statistics using SPSS*.
55. Bland JM, Altman DG (2003) Applying the right statistics: Analyses of measurement studies. *Ultrasound Obstet Gynecol* 22: 85-93. doi: 10.1002/uog.122. PubMed: 12858311.
56. Beckerman H, Roebroek ME, Lankhorst GJ, Becher JG, Bezemer PD et al. (2001) Smallest real difference: A link between reproducibility and responsiveness. *Qual Life Res* 10: 571-578. doi:10.1023/A:1013138911638. PubMed: 11822790.
57. Lexell JE, Downham DY (2005) How to assess the reliability of measurements in rehabilitation. *Am J Phys Med Rehabil* 84: 719-723. doi:10.1097/01.phm.0000176452.17771.20. PubMed: 16141752.
58. Lonczak HS, Abbott RD, Hawkins JD, Kosterman R, Catalano R (2002) The effects of the Seattle Social Development Project: Behavior, pregnancy, birth, and sexually transmitted disease outcomes by age 21. *Archives Pediatr Adolesc Health* 156: 438-447. doi:10.1001/archpedi.156.5.438.
59. Salvia J, Ysseldyke JE (1981) *Assessment in special remedial education*. Boston: Houghton Mifflin.
60. Dietmar S, Diego RC, Kathleen VU, Linda MT (2004) Interpreting method comparison studies by use of the Bland-Altman plot: Reflecting the importance of sample size by incorporating confidence limits and predefined error limits in the gap. *Clin Chem* 50: 2216-2218. doi: 10.1373/clinchem.2004.036095. PubMed: 15502104.
61. Bland JM (2000) *An introduction into medical statistics*. Oxford: Oxford University Press.
62. Hamilton C, Stamey J (2007) Using Bland-Altman to assess agreement between two medical devices-don't forget the confidence intervals! *J Clin Monit Comput* 21: 331-333. doi:10.1007/s10877-007-9092-x. PubMed: 17909978.
63. Bland JM, Altman DG (1996) Statistics Notes: Measurement error and correlation coefficients. *BMJ* 313: 41-42. doi:10.1136/bmj.313.7048.41. PubMed: 8664775.
64. Standard British Institution (1979) *Precision of test methods 1: Guide for the determination and reproducibility of a standard test method (BS5497, part 1)*. London: BSI.
65. Jaeschke R, Singer J, Guyatt GH (1989) Measurement of health status: Ascertaining the minimal clinically important difference. *Control Clin Trials* 10: 407-415. doi:10.1016/0197-2456(89)90005-6. PubMed: 2691207.
66. Gresham FM, Elliott SN (2008) *Social Skills Improvement System Rating Scales*. Minneapolis, MN: NCS Pearson.
67. Gresham FM, Elliott SN, Vance MJ, Cook CR (2011) Comparability of the Social Skills Rating System to the Social Skills Improvement System: Content and Psychometric Comparisons across Elementary and Secondary Age Levels. *Sch Psychol Q* 26: 27-44. doi:10.1037/a0022662.
